# Supplementary material for: The Knockout of Enterobactin-Related Gene in Pectobacterium atrosepticum Results in Reduced Stress Resistance and Virulence towards the Primed Plants
Source: MDPI journal article supplement (doi:10.3390/ijms22179594), 2021-09-04
Supplement: s1 [file s1]

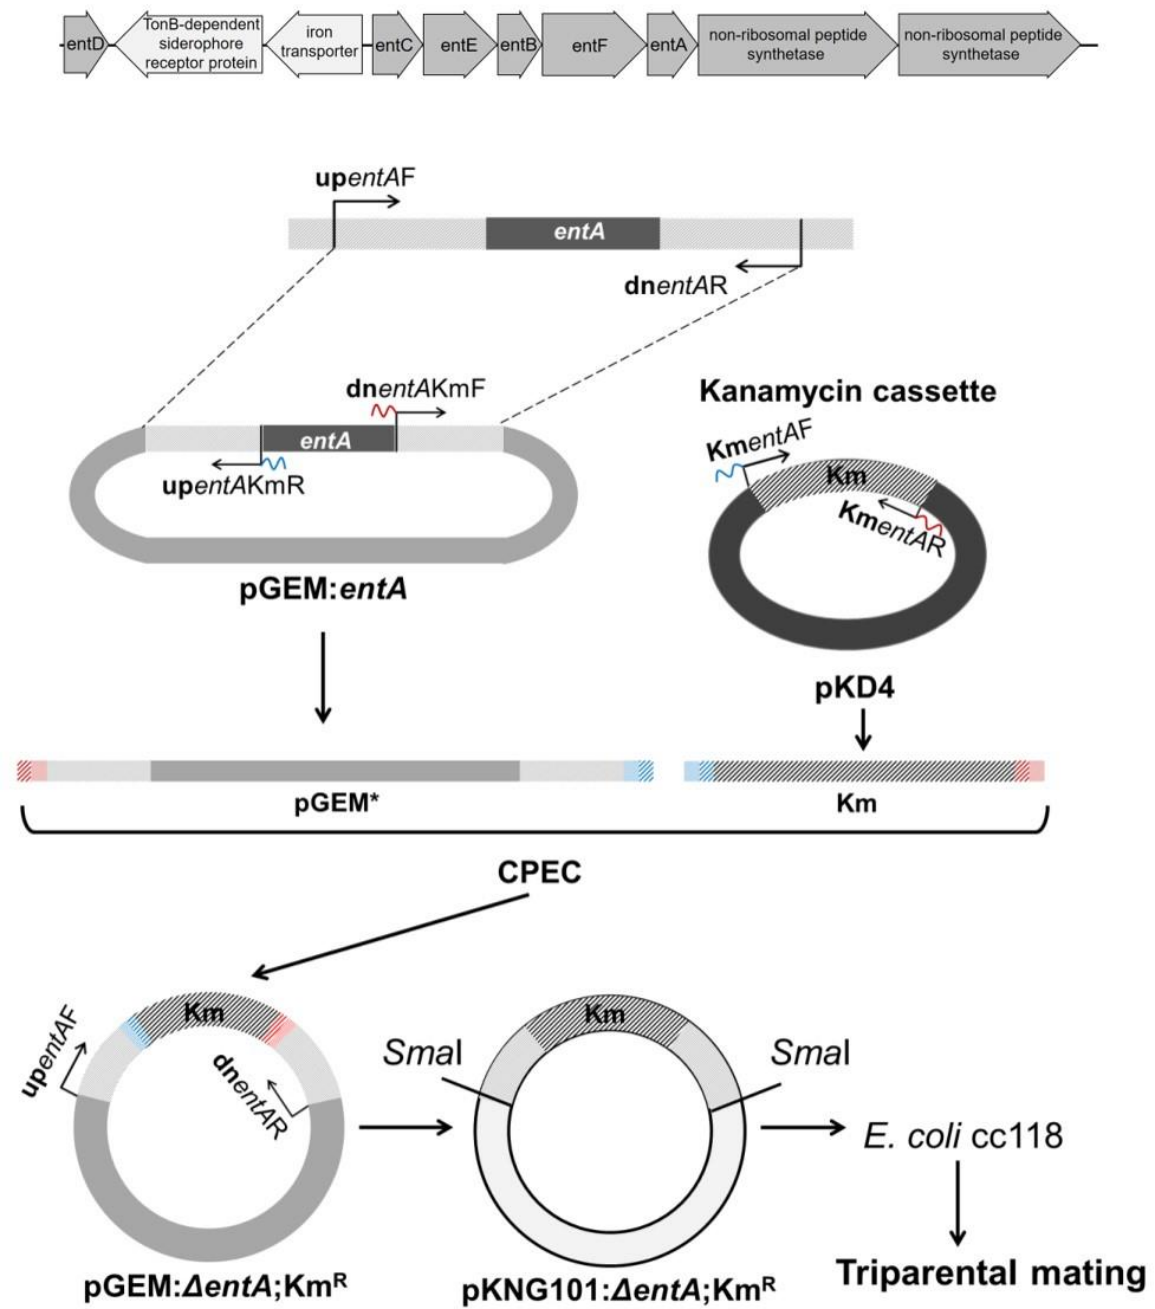

**Figure S1.** A scheme of the structure of the enterobactin gene cluster and the construction of *entA* deletion mutant (described in the text).
