# Supplementary material for: The Knockout of Enterobactin-Related Gene in Pectobacterium atrosepticum Results in Reduced Stress Resistance and Virulence towards the Primed Plants
Source: MDPI journal article supplement (doi:10.3390/ijms22179594), 2021-09-04
Supplement: s1 [file s1]

**Table S1.** Bacterial strains, plasmids and primers used in this study.

| Name                                                                 | Description                                                                                                                                                                                                                                             | Origin     |
|----------------------------------------------------------------------|---------------------------------------------------------------------------------------------------------------------------------------------------------------------------------------------------------------------------------------------------------|------------|
| <b>Strain</b>                                                        |                                                                                                                                                                                                                                                         |            |
| <i>Pectobacterium atrosepticum</i> SCRI1043 ( <i>Pba</i> )           | Wild type                                                                                                                                                                                                                                               | [1]        |
| <i>Pectobacterium atrosepticum</i> SCRI1043 $\Delta$ <i>entA</i>     | Mutant strain of SCRI1043 containing the kanamycin cassette in the chromosome;<br><i>Km<sup>R</sup></i>                                                                                                                                                 | This study |
| <i>Pectobacterium atrosepticum</i> SCRI1043comp $\Delta$ <i>entA</i> | Mutant strain of SCRI1043 containing the kanamycin cassette in the chromosome and the <i>entA</i> complementation construct on pGEM: <i>entA</i> ;<br><i>Amp<sup>R</sup></i>                                                                            | This study |
| <i>Escherichia coli</i> cc118                                        | Host for suicidal vector pKNG101;<br>$\Delta$ ( <i>ara</i> , <i>leu</i> ) <i>araD</i> $\Delta$ <i>lacX</i> 74 <i>galE</i> <i>galK</i> <i>PhoA20</i> <i>thi-1</i> <i>rpsE</i> <i>rpoB</i> <i>argE</i> ( <i>am</i> ) <i>recA1</i> , <i>Sm<sup>R</sup></i> | [2]        |
| <i>Escherichia coli</i> HH26/pNJ5000                                 | Mobilizing strain for conjugative transfer of the suicide vector pKNG101 into <i>Pba</i> cells;<br><i>tra+</i> ; <i>Tet<sup>R</sup></i>                                                                                                                 | [3]        |
| <i>Escherichia coli</i> NovaBlue                                     | <i>endA</i> <i>1hsdR17</i> ( <i>rK12-mK12+</i> ) <i>supE44</i> <i>thi-1</i> <i>recA1</i> <i>gyrA96</i> <i>relA1</i> <i>lacF'</i> [ <i>proA+</i> <i>B+</i> <i>lacIqZ</i> $\Delta$ <i>M15::Tn10</i> ( <i>Tet<sup>R</sup></i> )]                           | Novagen    |
| <b>Plasmids</b>                                                      |                                                                                                                                                                                                                                                         |            |
| pGEM-T Easy                                                          | Linearized vector for cloning;<br><i>f1 ori Amp<sup>R</sup> lacZ</i>                                                                                                                                                                                    | Promega    |
| pGEM: <i>entA</i>                                                    | <i>f1 ori Amp<sup>R</sup> lacZ entA</i>                                                                                                                                                                                                                 | This study |
| pGEM: $\Delta$ <i>entA</i> ; <i>Km<sup>R</sup></i>                   | <i>f1 ori Amp<sup>R</sup> lacZ Km<sup>R</sup></i>                                                                                                                                                                                                       | This study |
| pKD4                                                                 | Matrix for PCR amplification of kanamycin resistance cassette;<br><i>oriR<math>\gamma</math> rgnB bla Km<sup>R</sup></i>                                                                                                                                | [4]        |
| pKNG101                                                              | Suicide mobilized vector for inactivation of target genes;<br><i>pir-ori R6K mobRK2 sacB Sm<sup>R</sup></i>                                                                                                                                             | [5]        |
| pKNG101: $\Delta$ <i>entA</i> ; <i>Km<sup>R</sup></i>                | Suicide plasmid carrying mutant locus $\Delta$ <i>entA</i> ; <i>Km<sup>R</sup></i> ;<br><i>Km<sup>R</sup> SmR sacB</i>                                                                                                                                  | This study |
| pGEM: <i>entA</i> ; complementation construct                        | <i>f1 ori Amp<sup>R</sup> lacZ entA</i>                                                                                                                                                                                                                 | This study |
| <b>Primers</b>                                                       |                                                                                                                                                                                                                                                         |            |
| Primer name                                                          | Primer sequence 5'–3'                                                                                                                                                                                                                                   |            |
| <b>Primers for mutagenesis</b>                                       |                                                                                                                                                                                                                                                         |            |
| <b>upentAF</b>                                                       | GCTGCGTACCGATGAAATGC                                                                                                                                                                                                                                    |            |
| <b>dnentAR</b>                                                       | CAATGTCTTTCTCGCCGCTG                                                                                                                                                                                                                                    |            |
| <b>dnentAKmF</b>                                                     | CCATGTCAGCCGTTAAGGGATGGCGGGGCAACGCTGACGGCCTGATTG                                                                                                                                                                                                        |            |
| <b>upentAKmR</b>                                                     | CAGCTCCAGCCTACACAATCGAGGTTGTGCCTTGTTCATCATTTTC                                                                                                                                                                                                          |            |
| <b>KmentAF</b>                                                       | GATGAACAAGGCACAACCTCGATTGTGTAGGCTGGAGCTGCTTC                                                                                                                                                                                                            |            |
| <b>KmentAR</b>                                                       | GCCGTCAGCGTTGCCCGCCATCCCTTAACGGCTGACATGGGAATTAGC                                                                                                                                                                                                        |            |

|                                              |                                           |
|----------------------------------------------|-------------------------------------------|
| <b>CheckentAF</b>                            | CGAAAGGCGTGGAGATCGGC                      |
| <b>CheckentAR</b>                            | GCCAGCGGGGAGCCAATC                        |
| <b>Primers for complementation construct</b> |                                           |
| <b>promF</b>                                 | GCTTTCATCCATGACAGGCTCACATTTAG             |
| <b>promentAR</b>                             | TGTGCCTTGTTTCATCATAAGACAGCTCCTGCGCTCGCAA  |
| <b>promentAF</b>                             | TTTGCGAGCGCAGGAGCTGTCTTATGATGAACAAGGCACA  |
| <b>entAtermR</b>                             | GATGCTGCCCTTTATCACTGTTTCAGGCCGTCAGCGTTGCC |
| <b>entAtermF</b>                             | GGCAACGCTGACGGCCTGAACAGTGATAAAGGGCAGCATC  |
| <b>termR</b>                                 | CCTAAGCCTGCTATCTCCTCAGCATAAATTC           |
| <b>Primers for qRT-PCR</b>                   |                                           |
| <b>NtAOCF</b>                                | CGGCTCAACTGATTCCTCTACAAC                  |
| <b>NtAOGR</b>                                | GTTTGTTGCTAAAGGGGACAAGATC                 |
| <b>NtLOXF</b>                                | CACGCATAATGAGTTTGATAGTTTTG                |
| <b>NtLOXR</b>                                | CTGAGGAGTTGGGTACTTAAATAGGC                |
| <b>NtEFF</b>                                 | GCCCAACACTTCTTGATGCTC                     |
| <b>NtEFR</b>                                 | GACACCAGTTTCCACACGACC                     |
| <b>NtATPF</b>                                | GGTCGATGGCTTGGGAGTACC                     |
| <b>NtATPR</b>                                | GCACAGATTTACGTTCAATAATACCAG               |

1. Bell, K.S.; Sebaihia, M.; Pritchard, L.; Holden, M.T.G.; Hyman, L.J.; Holeva, M.C.; Thomson, N.R.; Bentley, S.D.; Churcher, L.J.C.; Mungall, K.; et al. Genome sequence of the enterobacterial phytopathogen *Erwinia carotovora* subsp. *atroseptica* and characterization of virulence factors. *Proc. Natl. Acad. Sci.* **2004**, *101*, 11105–11110.
2. Herrero, M.; de Lorenzo, V.; Timmis, K.N. Transposon vectors containing non-antibiotic resistance selection markers for cloning and stable chromosomal insertion of foreign genes in gram-negative bacteria. *J. Bacteriol.* **1990**, *172*, 6557–6567.
3. Grinter, N.J. A broad-host-range cloning vector transposable to various replicons. *Gene* **1983**, *21*, 133–143.
4. Datsenko, K.A.; Wanner, B.L. One-step inactivation of chromosomal genes in *Escherichia coli* K-12 using PCR products. *Proc. Natl. Acad. Sci.* **2000**, *97*, 6640–6645.
5. Kaniga, K.; Delor, I.; Cornelis, G.R. A wide-host-range suicide vector for improving reverse genetics in gram-negative bacteria: Inactivation of the *blaA* gene of *Yersinia enterocolitica*. *Gene* **1991**, *109*, 137–141.
